# Supplementary material for: Cache a Killer: Cache Valley virus seropositivity and associated farm management risk factors in sheep in Ontario, Canada
Source: PubMed Central journal article supplement (PMC10449202; doi:10.1371/journal.pone.0290443), 2023-08-24
Supplement: pone.0290443.s003.pdf [file pone.0290443.s003.pdf]

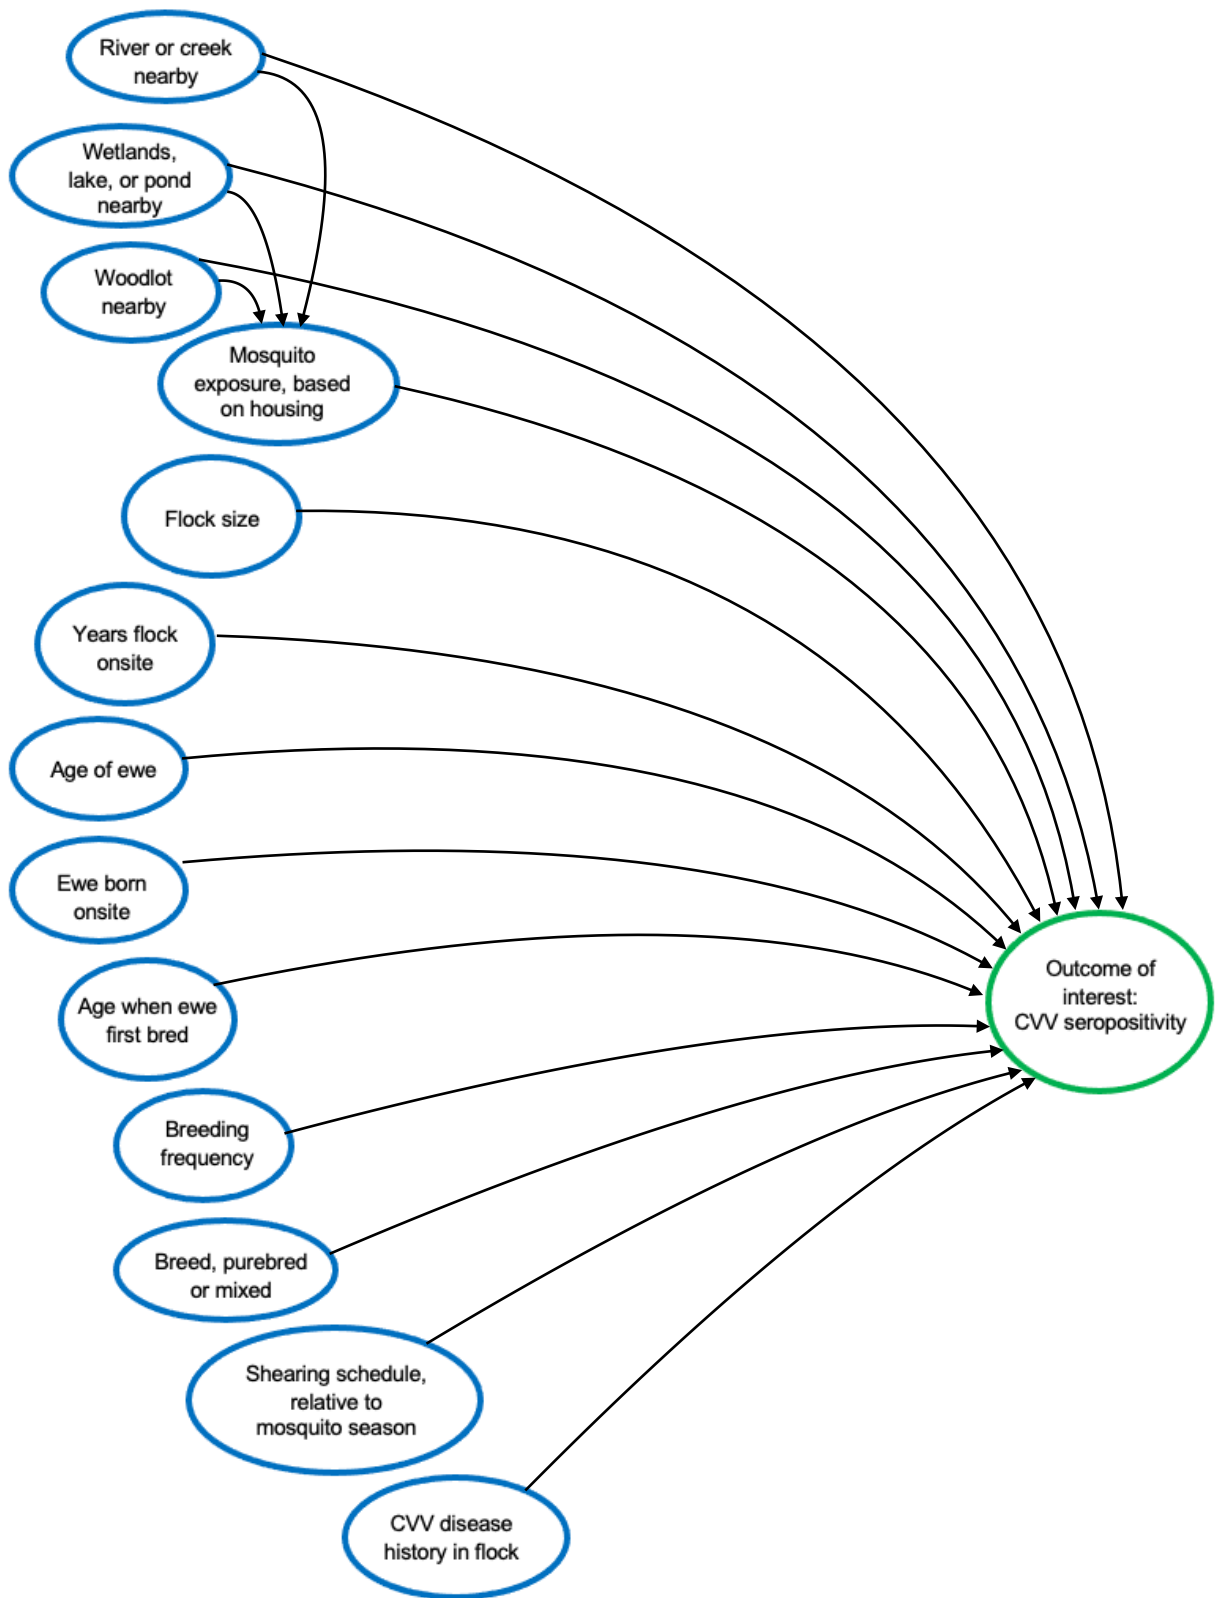

**Supplemental document 3.** Causal diagram depicting the associations between farm management, ewe characteristics, and surrounding farm environment (risk factors, blue circles) and ewe CVV seroprevalence (outcome of interest, green circle).
